# Supplementary material
Source: MDPI journal article supplement (https://www.mdpi.com/2077-1312/9/2/171)
Supplement: s1 [file s1]

## Supplementary data

**A**

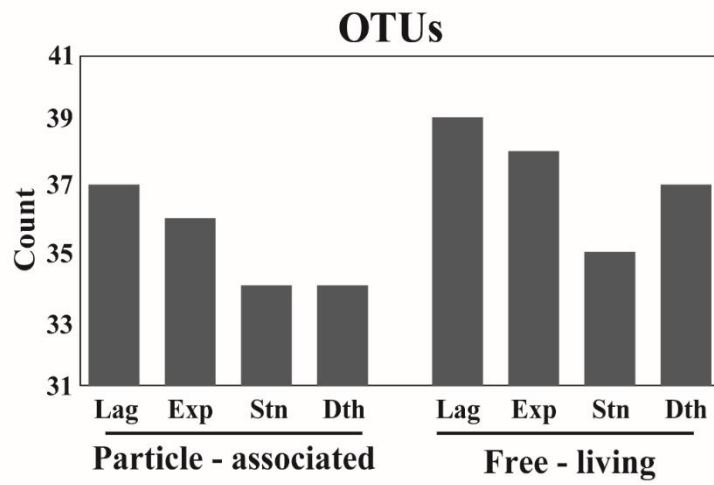

**B**

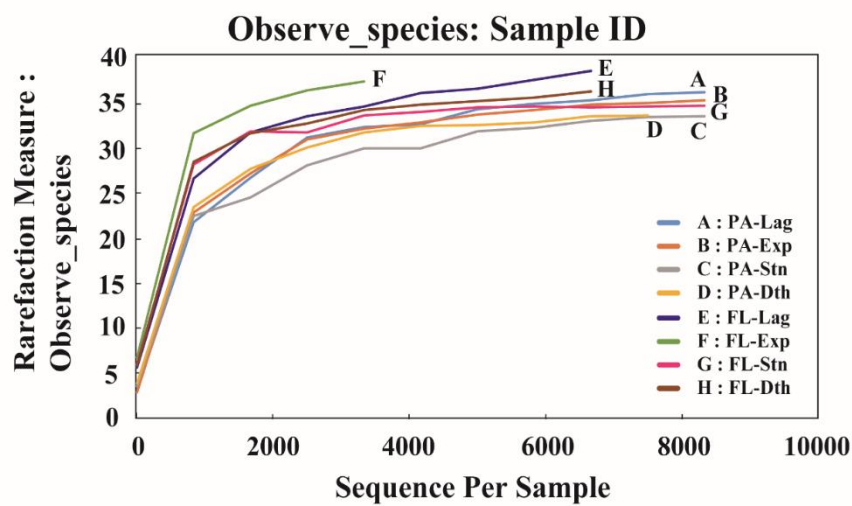

**Figure S1.** OTU counts (A) and rarefaction(B) of each growth phase of *Tetraselmis suecica*.

Abbreviations: FLB, free-living bacteria; PAB, particle-associated bacteria; Exp, exponential, Stn, stationary; Dth, death.
